# Supplementary material for: Aspergillus nidulans transcription factor AtfA interacts with the MAPK SakA to regulate general stress responses, development and spore functions
Source: PubMed Central journal article supplement (PMC3108070; doi:10.1111/j.1365-2958.2011.07581.x), 2011-03-01
Supplement: mmi0080-0436-SD1.pdf [file mmi0080-0436-SD1.pdf]

|                                   |     |                                                                                           |     |
|-----------------------------------|-----|-------------------------------------------------------------------------------------------|-----|
| <i>A.nidulans AtfA</i> 485 aa     | 1   | -----MSAAVASAVSTTLPSNP-TAHSSPMDAKKNSVKMDN-EASSETKE                                        | 43  |
| <i>A.oryzae BAD93190</i> 366 aa   | 1   | -----                                                                                     | 1   |
| <i>C.purpurea CAD21519</i> 550 aa | 1   | -----MGTSPPTNESKSPDLSSNKTRQDPTPGTKVDSVVKPN-----                                           | 36  |
| <i>S.pombe BAA12194</i> 566 aa    | 1   | MSPSPVNTSTEPASVAAVSNGNATASSTQVPENNQSDSFAPPSNNSQQNQ                                        | 50  |
| <i>A.nidulans AtfA</i> 485 aa     | 44  | <u>QKT</u> DGEPQTSLAPPSRPNPSAATDTP-DYFN-SVHNPFALEPNPFQSF                                  | 91  |
| <i>A.oryzae BAD93190</i> 366 aa   | 1   | -----                                                                                     | 1   |
| <i>C.purpurea CAD21519</i> 550 aa | 37  | GASNAEPTKPLAPPPRPHQPPQGNNTSDYFAGQVAGSLSLEPNPFQSF                                          | 86  |
| <i>S.pombe BAA12194</i> 566 aa    | 51  | QSSTIAPNGGAGSVANANPADQSDGVTPSFVGLK--LDYEPNPFHESFG                                         | 98  |
| <i>A.nidulans AtfA</i> 485 aa     | 91  | -----GGG-GETPGKSI LPPVASITSPALPG---                                                       | 116 |
| <i>A.oryzae BAD93190</i> 366 aa   | 1   | -----                                                                                     | 1   |
| <i>C.purpurea CAD21519</i> 550 aa | 86  | -----GGGGPETPGGKTLPSVASLTSPSSLL---                                                        | 112 |
| <i>S.pombe BAA12194</i> 566 aa    | 99  | STASVGGQGNPSLNRNPSLSNIPSGVPPAFARTLLPVPSSIASPDILSGAP                                       | 148 |
| <i>A.nidulans AtfA</i> 485 aa     | 116 | -----TSSAGGAYNWSN-SLRSGPLSPAMLAGFAGGSDYFDS-                                               | 152 |
| <i>A.oryzae BAD93190</i> 366 aa   | 1   | -----MLAGFTGSSDYFDS-                                                                      | 14  |
| <i>C.purpurea CAD21519</i> 550 aa | 112 | -----PGGNSTPFNWGGGSLRTGPLSPAMLSGFAN--DYFSDS                                               | 148 |
| <i>S.pombe BAA12194</i> 566 aa    | 149 | GIASPLGYPAWSAFTRGTMHNPLSPAITYDRLRPDYLNNE <del>SDASAAARFS</del>                            | 198 |
| <i>A.nidulans AtfA</i> 485 aa     | 152 | --IGRGFPTPNESSLR <del>RTGLTPGGGGSMFPAPSFNSQA</del> LLNQLQNGGATPS                          | 200 |
| <i>A.oryzae BAD93190</i> 366 aa   | 14  | --IGRGFPTPNESSLR <del>RTGLTPGGGGSMFPAPSFNSQA</del> LQQLQSGGATPS                           | 62  |
| <i>C.purpurea CAD21519</i> 550 aa | 149 | HHLRGGFPTPNESSLR <del>SGLTPGGGGSMFPAPPTPSQA</del> LFSQLASGGATPS                           | 198 |
| <i>S.pombe BAA12194</i> 566 aa    | 198 | --SGTGFTPGVNEPFR <del>SLLTPTGAC--FPAPSPGTAN</del> LLGFHTFDSQFPD                           | 244 |
| <i>A.nidulans AtfA</i> 485 aa     | 201 | TIEFHRTALN-----VKKNGIA-PTSNP-----T                                                        | 223 |
| <i>A.oryzae BAD93190</i> 366 aa   | 63  | TIEFHRTALNA-----AKKNALNGPTSNP-----T                                                       | 87  |
| <i>C.purpurea CAD21519</i> 550 aa | 199 | AIDFHRTA <del>INAAAAKREQGMPPRQSQHQQPTQSQQLQHSQQQSHQQHQH</del>                             | 248 |
| <i>S.pombe BAA12194</i> 566 aa    | 245 | QYR <del>ETPRDGK</del> P-----PVVNGTNGDQSDYFGANA <del>AVHGLCLLSQV</del>                    | 284 |
| <i>A.nidulans AtfA</i> 485 aa     | 224 | GEGDQV <del>PNITTT</del> -----MDIKPAQP-ATVDFGPHDAA <del>DAANGLF</del> MFL                 | 264 |
| <i>A.oryzae BAD93190</i> 366 aa   | 88  | SDPEQASONTN-----MDMKPNQP---DPFGHDAADAANGLF <del>MFL</del>                                 | 124 |
| <i>C.purpurea CAD21519</i> 550 aa | 249 | QHQQGGAQSATSAPPDITNGVPAVKLEQKQPSGPFDPHDN- <del>DAANGLF</del> MFL                          | 297 |
| <i>S.pombe BAA12194</i> 566 aa    | 285 | PDQQK <del>LQQP</del> ISSSEND-----QAASTANLLKQTQQQTFPDSIRPSETQ                             | 329 |
| <i>A.nidulans AtfA</i> 485 aa     | 265 | AKGGQSTANQFAAVSNQ <del>TAIP</del> PQTLQ <del>TSEILQDQNAARRQSVNVNG</del> -VAN              | 313 |
| <i>A.oryzae BAD93190</i> 366 aa   | 125 | AKGGQANPNQFA-VSNQ <del>SSIP</del> QNIQ <del>ND--QARDSRRTS</del> ---NG---                  | 164 |
| <i>C.purpurea CAD21519</i> 550 aa | 298 | AQGAQNRNGAQAPSHYNTSAPSHAHAPISSSQNP <del>NPSPQMSSGKAVSR</del>                              | 347 |
| <i>S.pombe BAA12194</i> 566 aa    | 330 | NTNPQAVTGTMN <del>PQASRTQQQ</del> PMYFMGSQQFNGMPSVYGDTVNPADPSLT                           | 379 |
| <i>A.nidulans AtfA</i> 485 aa     | 314 | TREPSGDGSE-QSEQAKP-ARGRGKRNTS <del>TKASSTGN-RRKTD</del> DS-TQGS                           | 359 |
| <i>A.oryzae BAD93190</i> 366 aa   | 165 | GRETSGDVSDVQGEQAKPATK <del>GK-KKNTATK</del> TSGAANNRRKAD <del>DAPVK</del> GS              | 213 |
| <i>C.purpurea CAD21519</i> 550 aa | 348 | GVSEATNGSG-DSEQAKPLPKGK <del>GKTAAS</del> ----ATNGRRK <del>AEDMPTK</del> AP               | 392 |
| <i>S.pombe BAA12194</i> 566 aa    | 380 | LRQTDFSGQNAENG <del>STNLP</del> QKTSNSDMP <del>TANSMPVK</del> LENGT <del>DYSTS</del> QEP  | 429 |
| <i>A.nidulans AtfA</i> 485 aa     | 360 | NKRTKLNGAASTE <del>SPSE-GESEEEEQ</del> QPAQKKAGDTK <del>KTMTDEEKRK</del> NF               | 408 |
| <i>A.oryzae BAD93190</i> 366 aa   | 214 | NKKAK--LSSGTEPPSDAGDSE <del>EEEEEQ--KKKSQ</del> SDSK <del>MTDEEKRK</del> NF               | 259 |
| <i>C.purpurea CAD21519</i> 550 aa | 393 | PTKKA <del>KGMPE</del> TMNGSVNEEDS <del>DDDDDDM--MGEDGN</del> PKVK <del>MTDEEKRK</del> NF | 440 |
| <i>S.pombe BAA12194</i> 566 aa    | 430 | SSNANNQSSPTSSINGKASSE <del>SANGTSYS-KGSSRR</del> NSKNE <del>TDEEKRK</del> SF              | 478 |
| <b>bZIP</b>                       |     |                                                                                           |     |
| <i>A.nidulans AtfA</i> 485 aa     | 409 | LERNRVAAL <del>KCRQ</del> KKQWLANLQAKV <del>LFTSEN</del> DALTTT <del>VTQLRE</del> IVNL    | 458 |
| <i>A.oryzae BAD93190</i> 366 aa   | 260 | LERNRVAAL <del>KCRQ</del> KKQWLANLQAKV <del>LFTSEN</del> DALTT <del>VTQLRE</del> IVNL     | 309 |
| <i>C.purpurea CAD21519</i> 550 aa | 441 | LERNRVAAL <del>KCRQ</del> KKQWLANLQNKV <del>EMYSSEN</del> DALTAQIT <del>QLRE</del> IVNL   | 490 |
| <i>S.pombe BAA12194</i> 566 aa    | 479 | LERNRQAAL <del>KCRQ</del> KKQWLSNLQAKV <del>FYGENE</del> ILSAQ <del>VSALRE</del> IVSL     | 528 |
| <i>A.nidulans AtfA</i> 485 aa     | 459 | KTLLLAHKDCPV <del>SQAQGL</del> -----IWN-----PNPP                                          | 483 |
| <i>A.oryzae BAD93190</i> 366 aa   | 310 | KTLLLAHKDCPV <del>SQAQGL</del> GLPLMMNGMSAGF--DPHPYNI <del>PNMMGM</del> QPGAP             | 357 |
| <i>C.purpurea CAD21519</i> 550 aa | 491 | KTLLLAHKDCPV <del>TQQQLH</del> GPYMAQVVEPYNAQ <del>MNPYGM</del> AGPIP-NQQQV               | 539 |
| <i>S.pombe BAA12194</i> 566 aa    | 529 | KTLLLAHKDCPV <del>AKSNXAAVATS</del> -----VIGSGDLAQ <del>R</del> IX                        | 563 |
| <i>A.nidulans AtfA</i> 485 aa     | 484 | YT----- 485                                                                               |     |
| <i>A.oryzae BAD93190</i> 366 aa   | 358 | IPTQGLRRQ-- 366                                                                           |     |
| <i>C.purpurea CAD21519</i> 550 aa | 540 | MAGQGVQRRFS 550                                                                           |     |
| <i>S.pombe BAA12194</i> 566 aa    | 564 | LGY----- 566                                                                              |     |

Fig. 1S. The *atfA* gene encodes a putative transcription factor of ATF/CREB family.

The amino acid sequence of *Aspergillus nidulans* AtfA is aligned with *Schizosaccharomyces pombe* Atf1, *Claviceps purpurea* Cptf1 and *Aspergillus oryzae* AtfB. Sequences are identified by species name, GenBank accession number and protein size. Underlined sequence indicates the amino acids deleted in the  $\Delta$ *atfA* mutant. The top red bar indicates the DNA binding domain as deduced from Expasy-Prosit database (<http://www.expasy.org/prosit/>).

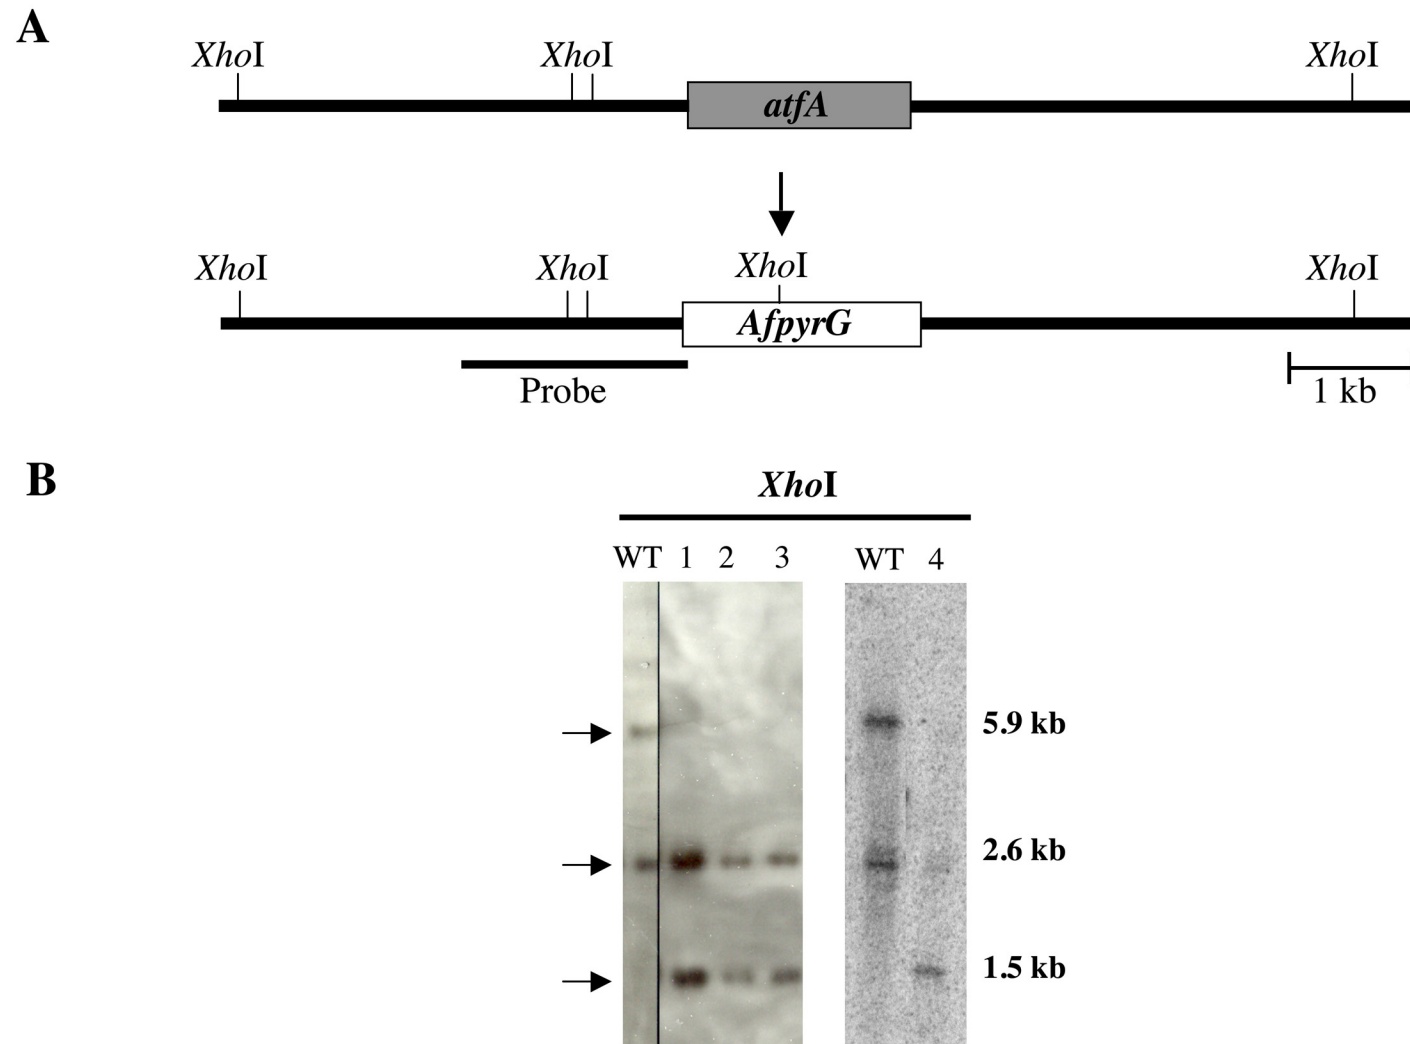

Fig. 2S. **Deletion of the *atfA* gene.** **(A)** The *atfA* deletion construct containing the *AfpyrG* gene as selective marker was generated by double-joint PCR and used to transform strains CFL3 and 11035. Double recombination results in the replacement of wild type *atfA* by the deletion construct. **(B)** DNA from WT and *PyrG*<sup>+</sup> transformants from CFL3 (1-3) and 11035 (4) strains was digested with *XhoI* and used for Southern blot analysis with the probe indicated in (A). The wild type *XhoI* pattern correspond to bands of 5.9 and 2.6 kb while  $\Delta$ *atfA* pattern corresponds to bands of 2.6 and 1.5 kb.

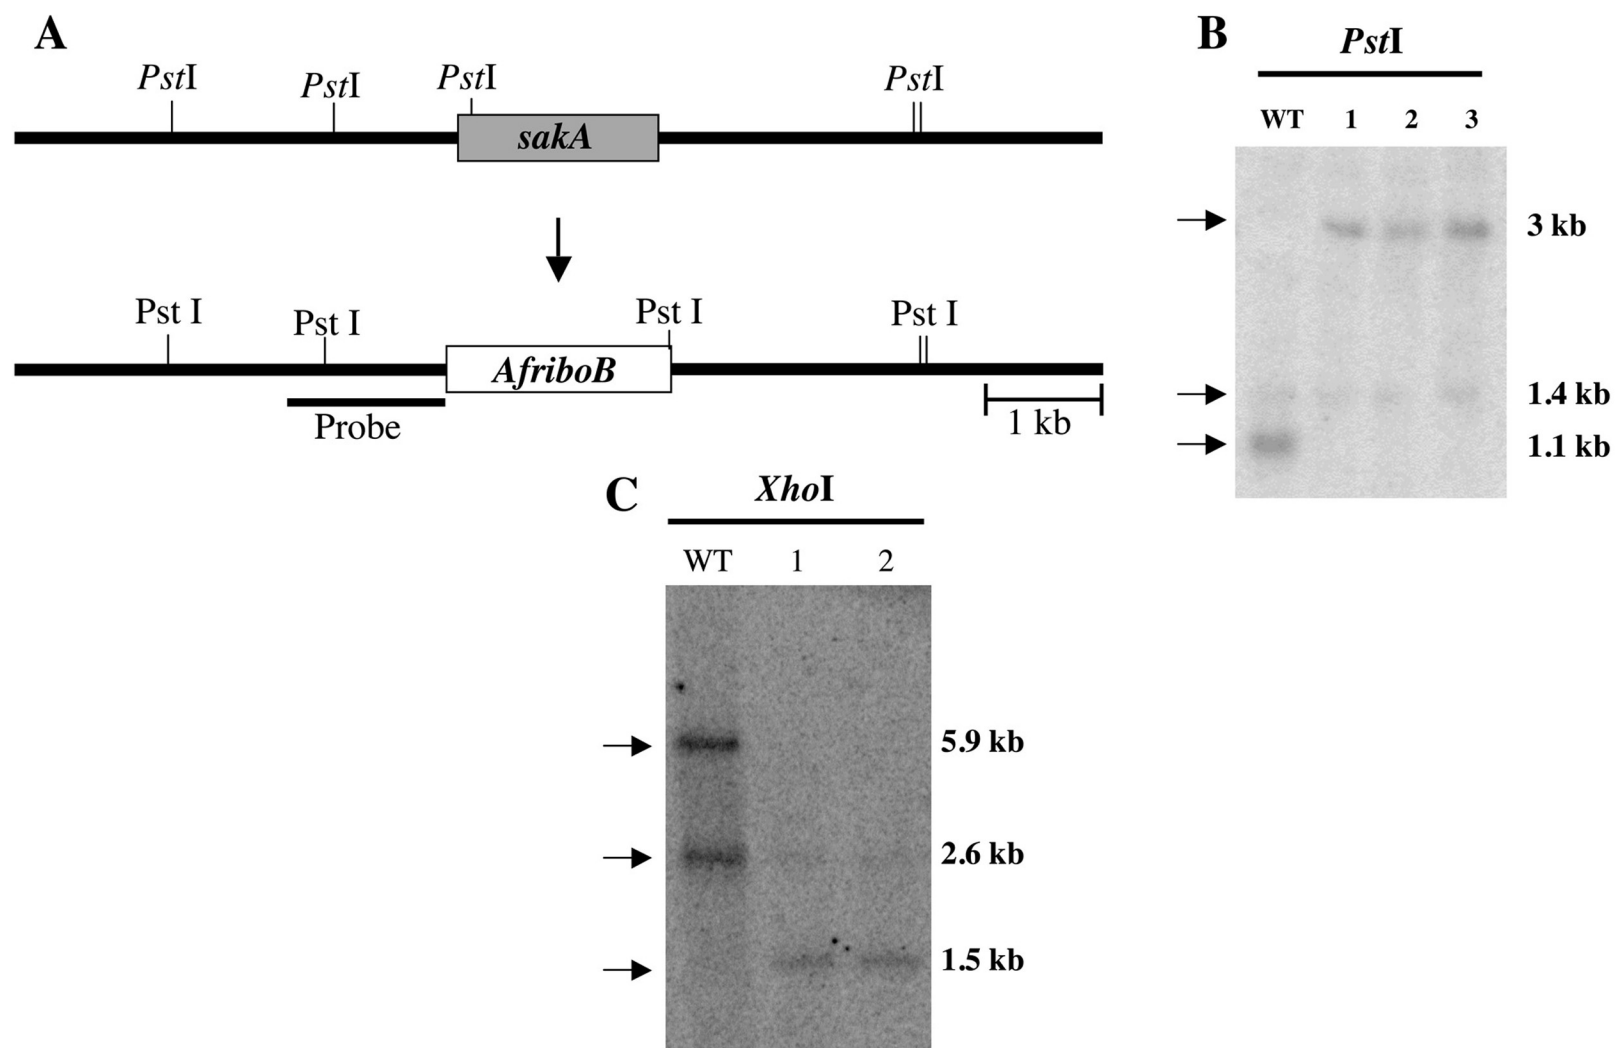

Fig. 3S. **Deletion of the *sakA* gene.** (A) A *sakA* deletion construct containing the *AfriboB* gene as selective marker was used to transform strain 11035. (B) To verify *sakA* deletion DNA of WT and RiboB<sup>+</sup> transformants (1-3) was digested with *Pst*I and used for Southern blot analysis with the indicated probe (A). Wild type *Pst*I pattern correspond to bands of 1.4 and 1.1 kb;  $\Delta$ *sakA* pattern corresponds to bands of 1.4 and 1.1 kb. (C)  $\Delta$ *sakA*  $\Delta$ *atfA* double mutants were generated by transformation of  $\Delta$ *sakA* strain TFL $\Delta$ *sakA*-03 with the *atfA*-*Afp**yrG* construct. *atfA* deletion was confirmed in PyrG<sup>+</sup> transformants 1 and 2, by Southern blot analysis as in Fig. 2S.



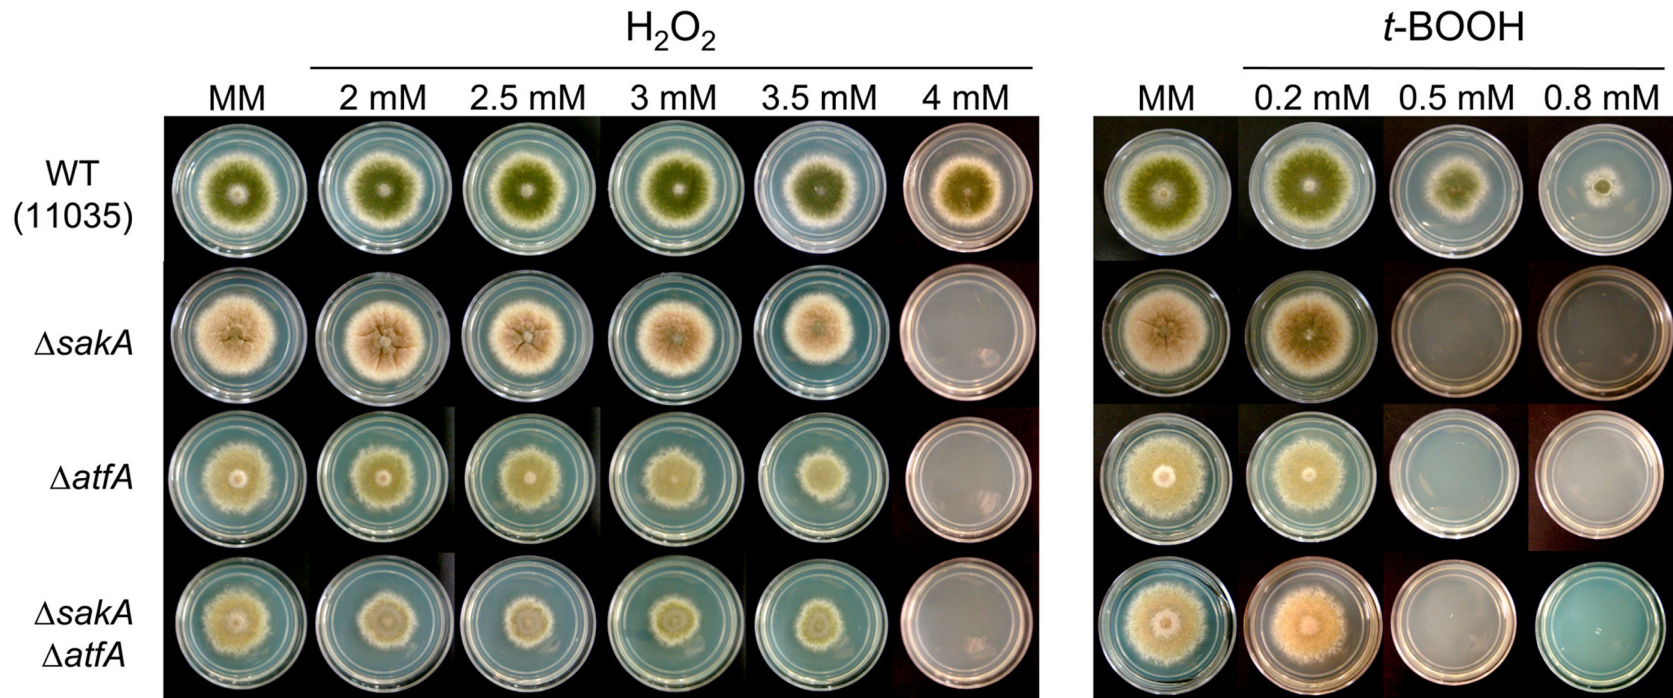

FIG. 4S. **Spores from single and double  $\Delta sakA$  and  $\Delta atfA$  mutants are equally sensitive to  $H_2O_2$  and *t*-BOOH.** Conidia ( $10^4$ ) from strains 11035 (WT), TFL $\Delta sakA$ -03 ( $\Delta sakA$ ), TFL $\Delta atfA$ -04 ( $\Delta atfA$ ) and TFL4 ( $\Delta sakA \Delta atfA$ ) were inoculated on plates containing de indicated concentrations of  $H_2O_2$  or *tert*-butyl hydroperoxide (*t*-BOOH) and incubated for 4 days at 37 °C.

**A**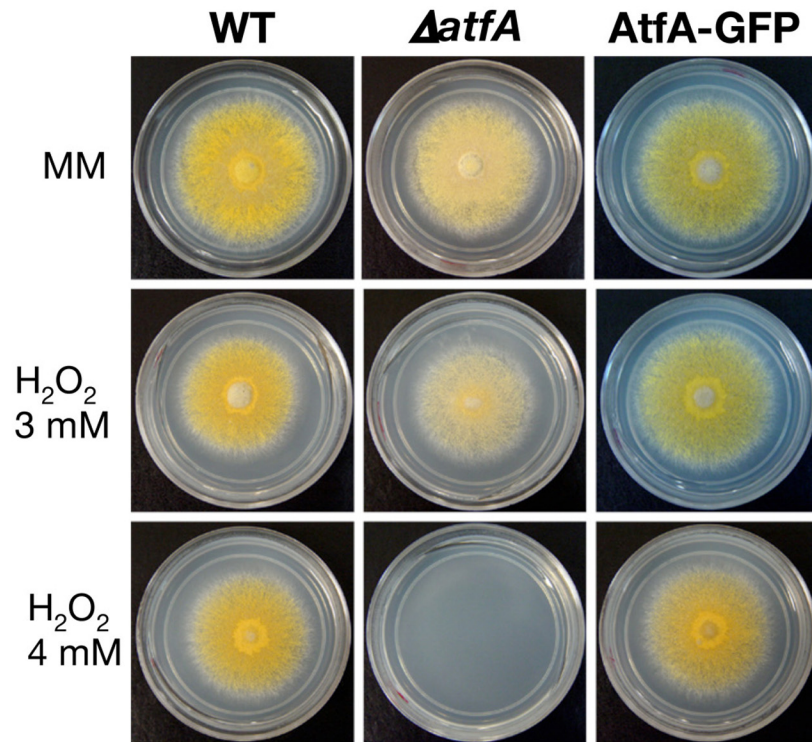**B**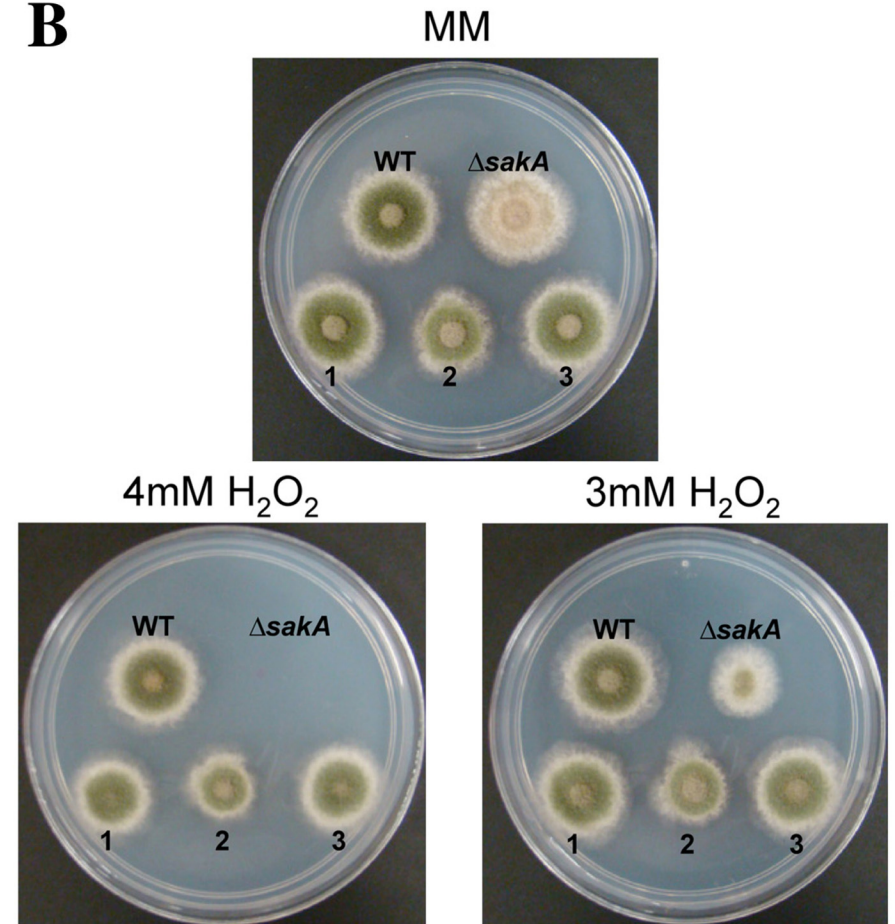

Fig. 5S. **GFP tagging does not interfere with *atfA* or *saka* function.** (A) Conidiospores ( $10^4$ ) from strains CLK43 (WT), CFL $\Delta atfA$ -02 ( $\Delta atfA$ ) and TFL3 (*atfA*-GFP) were inoculated on plates containing 3 or 4 mM H<sub>2</sub>O<sub>2</sub> and incubated at 37° C for 4 days. (B) Conidiospores from strains A1155 (WT), TFL $\Delta saka$ -03 ( $\Delta saka$ ) and three *saka*-GFP transformants were point inoculated on plates containing 3 or 4 mM H<sub>2</sub>O<sub>2</sub> and incubated at 37° C for 3 days. Transformant 3 was named TFL6 and selected for further experiments.



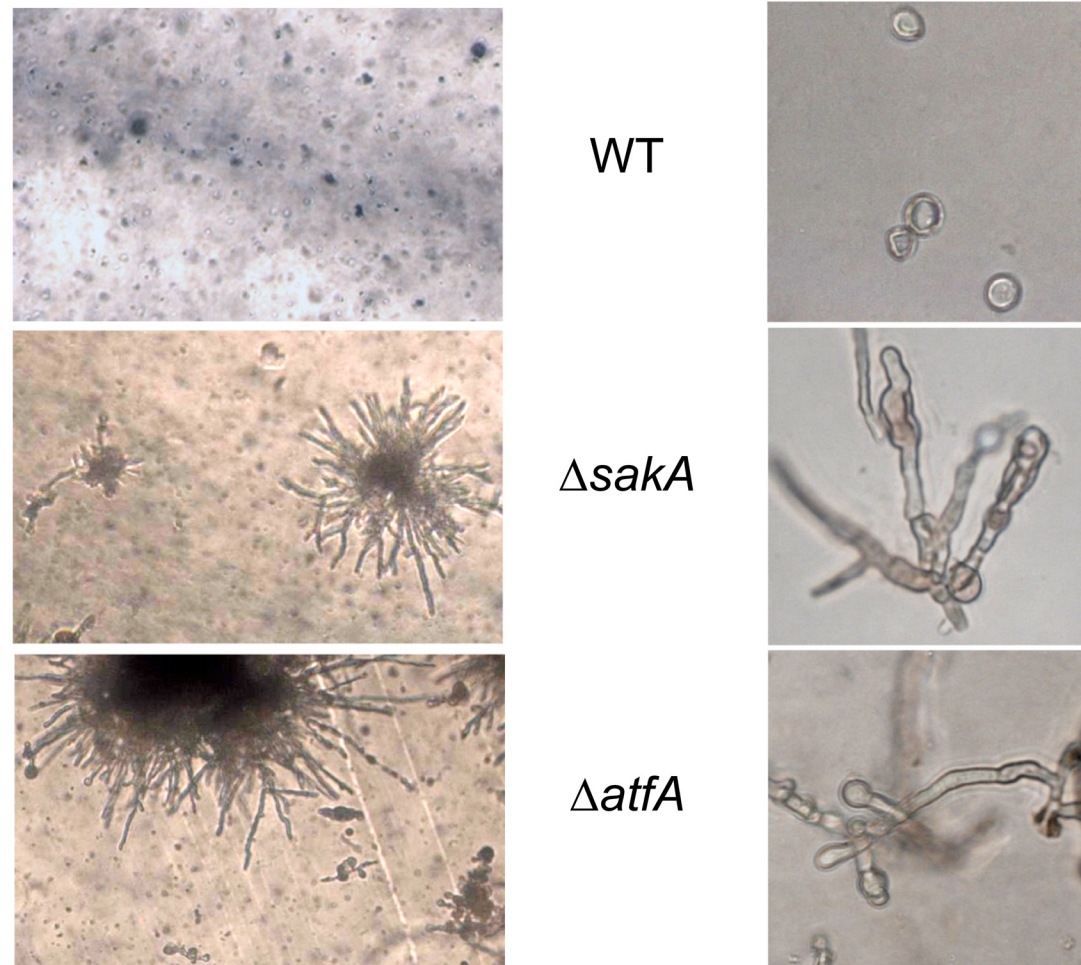

Fig. 6S. **Germination of WT,  $\Delta sakA$  and  $\Delta atfA$  conidia in the presence of fludioxonil on solid medium.** Conidia from indicated strains were streaked on plates containing minimal solid medium plus 2  $\mu\text{g/ml}$  of fludioxonil and incubated at 37 °C for 4 days. Pictures were taken under the microscope directly from inverted plates (left, 10X objective) or from samples scraped and transferred to a glass slide (right, 40X objective).

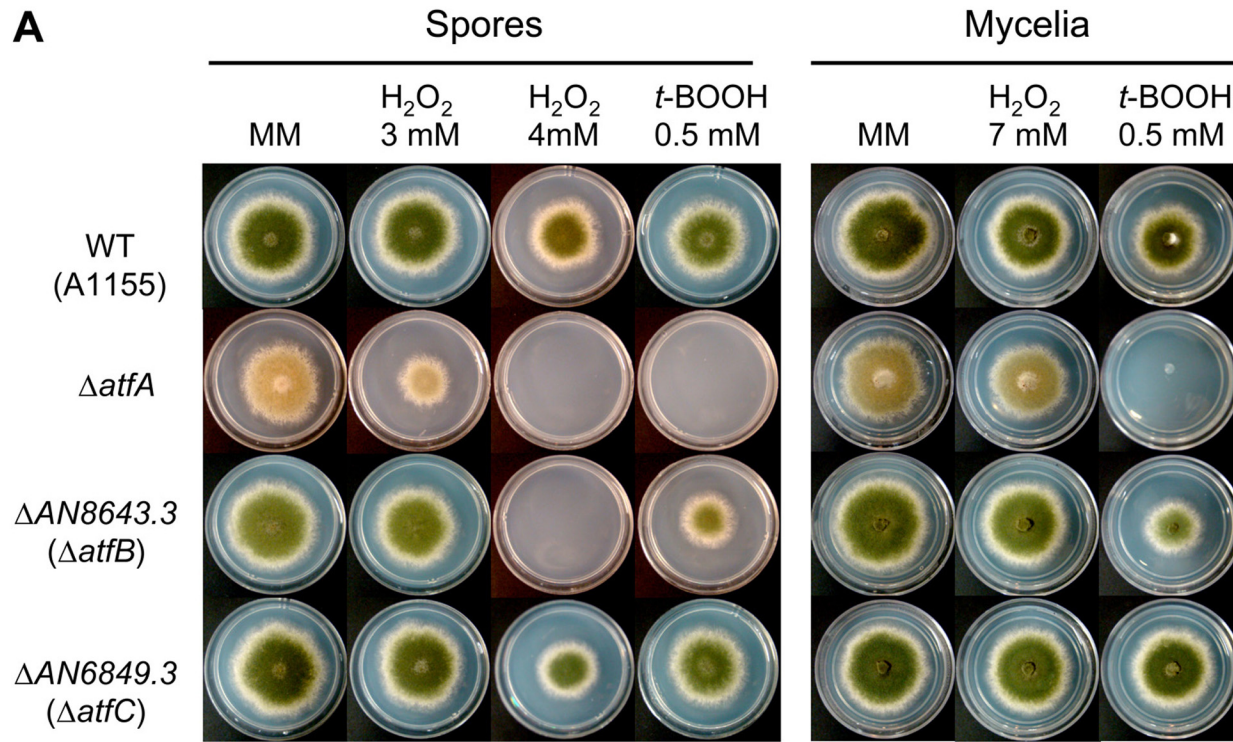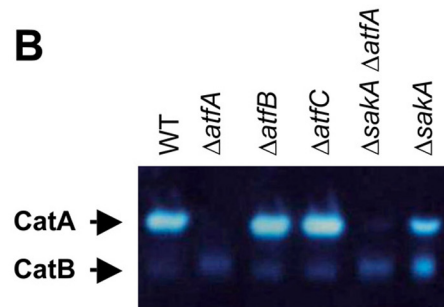

Fig 7S. **Oxidative stress sensitivity and spore catalase activity in mutants lacking putative transcription factors AtfA, AtfB and AtfC.** (A) Genes *AN8643.3* (*atfB*) and *AN6849.3* (*atfC*) were deleted in strain A1155, confirmed by Southern blot analysis and tested as in Fig. 1. (B) 30  $\mu$ g of protein extract prepared from spores of the indicated strains were processed as in Fig. 2, to determine catalase activity.
